# Supplementary material for: In Silico Analysis of SARS-CoV-2 Non-Structural Proteins Reveals an Interaction with the Host’s Heat Shock Proteins That May Contribute to Viral Replications and Development
Source: MDPI journal article supplement (doi:10.3390/cimb45120638), 2023-12-18
Supplement: s1 [file s1]

# MOLECULAR DOCKING TABLES

**Supplementary Table S1:** Tabular representation of the interactions between HSP40 and SARS-CoV-2 NSP2, showing amino acid residues from receptor and ligand-protein involved in the interaction, the types of bonds they produced, and the length of the bonds.

| PROTEIN | INTERACTION            |             | BOND TYPE                  | BOND LENGTH (Å) |
|---------|------------------------|-------------|----------------------------|-----------------|
|         | RECEPTOR               | LIGAND      |                            |                 |
| HSP40   | LYS220: HZ1            | HIS557: NE2 | Conventional hydrogen bond | 1.89            |
|         | LYS220: HZ2            | ASN556: OD1 | Conventional hydrogen bond | 1.67            |
|         | LYS220: HZ3            | ASN556:O    | Conventional hydrogen bond | 1.65            |
|         | THR259: HG1            | ASP553: OD2 | Conventional hydrogen bond | 1.87            |
|         | ASN556:HN              | THR259: OG1 | Conventional hydrogen bond | 2.54            |
|         | GLY258: HA1            | ASN556: OD1 | Conventional hydrogen bond | 2.68            |
|         | THR259: HB             | ASP553: OD2 | Carbon hydrogen bond       | 2.89            |
|         | LYS220: NZ             | HIS557      | Carbon hydrogen bond       | 3.23            |
|         | ASP553: OD2            | PHE311      | Carbon hydrogen bond       | 4.97            |
|         | ALA554: C, O ALA555: N | PHE311      | Carbon hydrogen bond       | 4.83            |
|         | PHE311:-               | ALA554      | Carbon hydrogen bond       | 4.6             |

**Supplementary Table S2:** Tabular representation of the interactions between HSP70 (HSPA4) and SARS-CoV-2 NSP2, showing amino acid residues from receptor and ligand-protein involved in the interaction, the types of bonds they produced, and the length of the bonds.

| PROTEIN | INTERACTIONS |             | BOND TYPE                  | BOND LENGTH<br>(Å) |
|---------|--------------|-------------|----------------------------|--------------------|
|         | RECEPTOR     | LIGAND      |                            |                    |
| HSP70   | ARG169:NE    | ASP553: OD2 | Electrostatic force        | 4.5                |
|         | ARG169: HH11 | ASP553: OD1 | Conventional hydrogen bond | 1.8                |
|         | ARG169:HH21  | ASP553: OD1 | Conventional hydrogen bond | 2.93               |
|         | ARG169: HH21 | ASP553: O   | Conventional hydrogen bond | 1.97               |
|         | ARG169: HH21 | ALA554: O   | Conventional hydrogen bond | 2.44               |
|         | ASN172: HD21 | ASN556: OD1 | Conventional hydrogen bond | 2.28               |
|         | ASN172: HD21 | ASN556: O   | Conventional hydrogen bond | 3.07               |
|         | ASN172: HD21 | ASN556: O   | Conventional hydrogen bond | 3.09               |
|         | THR175: HG1  | ASN556: OD1 | Conventional hydrogen bond | 1.80               |
|         | GLN379: HE22 | ASP553: OD2 | Conventional hydrogen bond | 1.95               |
|         | CYS380: HG   | THR551: O   | Conventional hydrogen bond | 2.44               |

**Supplementary Table S3:** Tabular representation of the interactions between HSP90 and SARS-CoV-2 NSP2, showing amino acid residues from receptor and ligand-protein involved in the interaction, the types of bonds they produced, and the length of the bonds.

| PROTEIN NAME | INTERACTION |             | BOND TYPE                  | BOND LENGTH (Å) |
|--------------|-------------|-------------|----------------------------|-----------------|
|              | RECEPTOR    | LIGAND      |                            |                 |
| HSP90        | LYS402: HZ2 | ASP553: OD2 | Conventional hydrogen bond | 1.75            |
|              | SER365: HG  | ASN556: OD1 | Conventional hydrogen bond | 1.82            |
|              | GLN397: HN  | ASP553: O   | Conventional hydrogen bond | 2.54            |
|              | SER398: HN  | ASP553: O   | Conventional hydrogen bond | 2.00            |
|              | LYS399: HN  | ASP553: OD2 | Conventional hydrogen bond | 2.25            |
|              | LY402: HZ1  | ASP553: OD1 | Conventional hydrogen bond | 1.89            |
|              | ALA555: HN  | SER398: OG  | Conventional hydrogen bond | 1.89            |
|              | GLN397: HA  | ASP553: O   | Carbon hydrogen bond       | 2.71            |

**Supplementary Table S4:** Tabular representation of the interactions between human AdoMetDC and SARS-CoV-2 NSP2, showing amino acid residues from receptor and ligand-protein involved in the interaction, the types of bonds they produced, and the length of the bonds.

| PROTEIN NAME | INTERACTIONS |             | BOND TYPE                  | BOND LENGTH (Å) |
|--------------|--------------|-------------|----------------------------|-----------------|
|              | RECEPTOR     | LIGAND      |                            |                 |
| ADOMET-DC    | ASN138: HD21 | SER528: OG  | Conventional hydrogen bond | 1.99            |
|              | ASN138: HD21 | SER528: O   | Conventional hydrogen bond | 2.69            |
|              | TRP331: HN   | ALA139: O   | Conventional hydrogen bond | 2.87            |
|              | ARG527: HH22 | GLY144: O   | Conventional hydrogen bond | 1.76            |
|              | ARG550: HN   | GLU135: OE1 | Conventional hydrogen bond | 2.86            |
|              | SER594: HG   | GLU135: OE2 | Carbon hydrogen bond       | 1.99            |
|              | TRP331: HD1  | ALA139: O   | Carbon hydrogen bond       | 2.28            |
|              | HIS343: HE1  | GLU135: O   | Carbon hydrogen bond       | 2.46            |

|  |             |             |                      |      |
|--|-------------|-------------|----------------------|------|
|  | SER528: HB2 | GLU135: OE2 | Carbon hydrogen bond | 3.04 |
|  | SER594: HB1 | GLU135: OE2 | Carbon hydrogen bond | 2.63 |
|  | HIS343      | ALA139      | Alkyl bond           | 5.10 |

**Supplementary Table S5:** ZincPharmer Top 10 results.

| <b>Name</b>  | <b>RMSD</b> | <b>Mass</b> | <b>RBnds</b> |
|--------------|-------------|-------------|--------------|
| ZINC01150525 | 0.509       | 464         | 13           |
| ZINC85324008 | 0.511       | 331         | 10           |
| ZINC395648   | 0.513       | 385         | 12           |
| ZINC89721135 | 0.506       | 344         | 6            |
| ZINC48717915 | 0.516       | 297         | 6            |
| ZINC68063362 | 0.508       | 381         | 5            |
| ZINC33813201 | 0.509       | 510         | 3            |
| ZINC20193285 | 0.509       | 486         | 6            |
| ZINC35568236 | 0.509       | 472         | 7            |

**Supplementary Table S6:** binding affinity for the studied complexes obtained from AREA AFFINITY.

| <b>Model name</b>    | <b>Predicted binding affinity<br/>(log(K) kcal/mol)</b> |
|----------------------|---------------------------------------------------------|
| HSP 40/70 and NSP2   | -6.5113907                                              |
| HSP40/70/90 and NSP2 | -8.7796222                                              |
| HSP 70/90 and NSP2   | -9.7906521                                              |
